# Supplementary material for: Bridging the gap: the OPTIONS program as a model for integrating career development into biomedical PhD training
Source: Frontiers journal article supplement (doi:10.3389/feduc.2025.1478553), 2025-02-19
Supplement: Data_Sheet_1.pdf [file Data_Sheet_1.pdf]

## Appendix A:

### OPTIONS Phase 2 | Pre-Year 3 Survey

The purpose of this survey is to help with the evaluation of the OPTIONS program and its effectiveness. The survey will take approximately 10 minutes to complete, and all the information you provide will be kept anonymous.

If you prefer to not have your data used for in future publications, please click the box below.

1) Please indicate how much you currently identify with each of the following statements.

|                                                                                              | Very Untrue<br>of Me  | Somewhat<br>Untrue of Me | Neutral               | Somewhat<br>Untrue of Me | Very True of<br>Me    |
|----------------------------------------------------------------------------------------------|-----------------------|--------------------------|-----------------------|--------------------------|-----------------------|
| I understand what career paths will be available to me after graduation.                     | <input type="radio"/> | <input type="radio"/>    | <input type="radio"/> | <input type="radio"/>    | <input type="radio"/> |
| I understand what skills are needed to succeed in one or more careers.                       | <input type="radio"/> | <input type="radio"/>    | <input type="radio"/> | <input type="radio"/>    | <input type="radio"/> |
| I understand how my skills can be applied to different careers.                              | <input type="radio"/> | <input type="radio"/>    | <input type="radio"/> | <input type="radio"/>    | <input type="radio"/> |
| I can clearly define my career-related interests.                                            | <input type="radio"/> | <input type="radio"/>    | <input type="radio"/> | <input type="radio"/>    | <input type="radio"/> |
| I am confident in my ability to seek advice from professionals in my desired career path(s). | <input type="radio"/> | <input type="radio"/>    | <input type="radio"/> | <input type="radio"/>    | <input type="radio"/> |
| I am confident in my ability to achieve my career goals.                                     | <input type="radio"/> | <input type="radio"/>    | <input type="radio"/> | <input type="radio"/>    | <input type="radio"/> |

2) Please indicate how much you agree/disagree with each of the following statements.

|                                                                                                            | Strongly<br>Disagree  | Disagree              | Neither agree<br>nor disagree | Agree                 | Strongly<br>agree     |
|------------------------------------------------------------------------------------------------------------|-----------------------|-----------------------|-------------------------------|-----------------------|-----------------------|
| I can articulate how skills developed during my graduate training translate into my career(s) of interest. | <input type="radio"/> | <input type="radio"/> | <input type="radio"/>         | <input type="radio"/> | <input type="radio"/> |
| I know what career-related skill(s) I need to further develop before graduating.                           | <input type="radio"/> | <input type="radio"/> | <input type="radio"/>         | <input type="radio"/> | <input type="radio"/> |
| I am aware of specific actions I can take to develop these skills.                                         | <input type="radio"/> | <input type="radio"/> | <input type="radio"/>         | <input type="radio"/> | <input type="radio"/> |

3) Please indicate your confidence to perform each of the following actions or skills:

|                                                                                                                                                       | Not at all<br>confident | Slightly<br>Confident | Somewhat<br>confident | Moderately<br>confident | Extremely<br>confident |
|-------------------------------------------------------------------------------------------------------------------------------------------------------|-------------------------|-----------------------|-----------------------|-------------------------|------------------------|
| Find general career information such as duties and nature of work about the careers in which you are interested.                                      | <input type="radio"/>   | <input type="radio"/> | <input type="radio"/> | <input type="radio"/>   | <input type="radio"/>  |
| Find specific career information about the education or training required, salary, and employment trends for the careers in which you are interested. | <input type="radio"/>   | <input type="radio"/> | <input type="radio"/> | <input type="radio"/>   | <input type="radio"/>  |
| Explain how your interests match those of people in the careers you are considering.                                                                  | <input type="radio"/>   | <input type="radio"/> | <input type="radio"/> | <input type="radio"/>   | <input type="radio"/>  |
| Develop a professional network.                                                                                                                       | <input type="radio"/>   | <input type="radio"/> | <input type="radio"/> | <input type="radio"/>   | <input type="radio"/>  |
| Set short-term goals (i.e., covering the next 1–3 years).                                                                                             | <input type="radio"/>   | <input type="radio"/> | <input type="radio"/> | <input type="radio"/>   | <input type="radio"/>  |
| Prepare application materials for a job of interest.                                                                                                  | <input type="radio"/>   | <input type="radio"/> | <input type="radio"/> | <input type="radio"/>   | <input type="radio"/>  |

4) What was the most beneficial aspect of Phase 1 (year 1-2) of the OPTIONS program?

---

5) How could Phase 1 of the OPTIONS program be improved?

---

6) Which career community BEST aligns with your career interests? (Select all that apply).

☐

Academic Research

☐

Academic Teaching

☐

Biotech & Pharma

☐

Business Side of Science

☐

Science Policy & Communications

☐

None. I would like to pursue an OPTIONS alternative to fulfill my requirements.

7) What skills or knowledge would you like to gain this year by participating in the OPTIONS Career Community workshops?

---

## Appendix B:

### OPTIONS Phase 2 | Post-Year 3 Survey

The purpose of this survey is to help with the evaluation of the OPTIONS program and its effectiveness. The survey will take approximately 10 minutes to complete, and all the information you provide will be kept anonymous.

If you prefer to not have your data used for in future publications, please click the box below.

1) Please indicate how much you currently identify with each of the following statements.

|                                                                                              | Very Untrue<br>of Me  | Somewhat<br>Untrue of Me | Neutral               | Somewhat<br>Untrue of Me | Very True of<br>Me    |
|----------------------------------------------------------------------------------------------|-----------------------|--------------------------|-----------------------|--------------------------|-----------------------|
| I understand what career paths will be available to me after graduation.                     | <input type="radio"/> | <input type="radio"/>    | <input type="radio"/> | <input type="radio"/>    | <input type="radio"/> |
| I understand what skills are needed to succeed in one or more careers.                       | <input type="radio"/> | <input type="radio"/>    | <input type="radio"/> | <input type="radio"/>    | <input type="radio"/> |
| I understand how my skills can be applied to different careers.                              | <input type="radio"/> | <input type="radio"/>    | <input type="radio"/> | <input type="radio"/>    | <input type="radio"/> |
| I can clearly define my career-related interests.                                            | <input type="radio"/> | <input type="radio"/>    | <input type="radio"/> | <input type="radio"/>    | <input type="radio"/> |
| I am confident in my ability to seek advice from professionals in my desired career path(s). | <input type="radio"/> | <input type="radio"/>    | <input type="radio"/> | <input type="radio"/>    | <input type="radio"/> |
| I am confident in my ability to achieve my career goals.                                     | <input type="radio"/> | <input type="radio"/>    | <input type="radio"/> | <input type="radio"/>    | <input type="radio"/> |

2) Please indicate how much you agree/disagree with each of the following statements.

|                                                                                                            | Strongly<br>Disagree  | Disagree              | Neither agree<br>nor disagree | Agree                 | Strongly<br>agree     |
|------------------------------------------------------------------------------------------------------------|-----------------------|-----------------------|-------------------------------|-----------------------|-----------------------|
| I can articulate how skills developed during my graduate training translate into my career(s) of interest. | <input type="radio"/> | <input type="radio"/> | <input type="radio"/>         | <input type="radio"/> | <input type="radio"/> |
| I know what career-related skill(s) I need to further develop before graduating.                           | <input type="radio"/> | <input type="radio"/> | <input type="radio"/>         | <input type="radio"/> | <input type="radio"/> |
| I am aware of specific actions I can take to develop these skills.                                         | <input type="radio"/> | <input type="radio"/> | <input type="radio"/>         | <input type="radio"/> | <input type="radio"/> |

3) Please indicate your confidence to perform each of the following actions or skills:

|                                                                                                                                                       | Not at all<br>confident | Slightly<br>Confident | Somewhat<br>confident | Moderately<br>confident | Extremely<br>confident |
|-------------------------------------------------------------------------------------------------------------------------------------------------------|-------------------------|-----------------------|-----------------------|-------------------------|------------------------|
| Find general career information such as duties and nature of work about the careers in which you are interested.                                      | <input type="radio"/>   | <input type="radio"/> | <input type="radio"/> | <input type="radio"/>   | <input type="radio"/>  |
| Find specific career information about the education or training required, salary, and employment trends for the careers in which you are interested. | <input type="radio"/>   | <input type="radio"/> | <input type="radio"/> | <input type="radio"/>   | <input type="radio"/>  |
| Explain how your interests match those of people in the careers you are considering.                                                                  | <input type="radio"/>   | <input type="radio"/> | <input type="radio"/> | <input type="radio"/>   | <input type="radio"/>  |
| Develop a professional network.                                                                                                                       | <input type="radio"/>   | <input type="radio"/> | <input type="radio"/> | <input type="radio"/>   | <input type="radio"/>  |
| Set short-term goals (i.e., covering the next 1–3 years).                                                                                             | <input type="radio"/>   | <input type="radio"/> | <input type="radio"/> | <input type="radio"/>   | <input type="radio"/>  |
| Prepare application materials for a job of interest.                                                                                                  | <input type="radio"/>   | <input type="radio"/> | <input type="radio"/> | <input type="radio"/>   | <input type="radio"/>  |

4) What was the most beneficial aspect of participating in the OPTIONS workshops?

5) Following the informational interview assignment, how likely are you to conduct additional informational interviews in the next year?

- Extremely Unlikely
- Unlikely
- Neutral
- Likely
- Extremely Likely

6) Which of the following experiences would you be interested in pursuing in the next 1-3 years?  
(Select all that apply)

- Internships
- Experiential Learning Opportunities
  - Data Science
  - Science Policy
  - Science Communication
  - Regulatory
  - Patent Law
- Resiliency Training
- Leadership Training
- JHU Teaching Academy
- JHU Empower Your Pitch, a Doctoral Research Communication Competition
- JHTV's Commercialization Academy
- JHU Pava Center for Entrepreneurship
- Join a student group

7) What suggestions do you have for improving the OPTIONS program and/or the student experience?

8) Would you be interested in participating in a follow-up interview to share more feedback about your experience in the OPTIONS program?



## Appendix C:

### OPTIONS Phase 2 | Self-reflection prompts

#### Reflection Assignments

Use this form to log your participation in OPTIONS programming. You can access your responses at any time, which will be incredibly helpful when you create your career goals for the coming year(s).

If your career interests do not align with the OPTIONS events or you would like to engage in alternative career-related training, contact the OPTIONS Program Director to discuss your interests in more detail. If you receive approval to participate in an "OPTIONS Alternative Activity", you can use this form to log your participation.

**Question 1:** What type of activity did you complete?

- Live OPTIONS Workshop
- Recorded OPTIONS Workshop
- "OPTIONS Alternative Activity" Note: this must be pre-approved by the OPTIONS Director

**Question 2:** What career community series did this workshop fall within? If an "OPTIONS Alternative Activity", which career community is it most closely associated with?

- Academic Research
- Academic Teaching
- Biotech & Pharma
- Business Side of Science
- Science Policy & Communications
- None of the above

**Question 3:** What was the name of the OPTIONS Workshop or "OPTIONS Alternative Activity"?

**Question 4:** What date did you participate in the event or complete the activity?

**Question 5:** What was the length of the workshop or activity?

**Question 6:** List 3 interesting discoveries you made during this event or activity. For example, did you learn anything about this career path that surprised you? What characteristics of this career path did you like most? Alternatively, which characteristics did you not like?

**Question 7:** How has this workshop or activity refined your career interests? For example, are you still interested in this career path? Why or why not?

**Question 8:** How do you plan to apply the knowledge you learned in the future? For example, are there specific skills you want to develop or additional activities you want to participate in?

**Question 9:** What questions do you still have about this career path? What more do you need to learn to know whether you want to pursue this career or not?

**Question 10:** Final thoughts?
